# Supplementary material for: Linseed Oil-Based Oleogel Vehicles for Hydrophobic Drug Delivery—Physicochemical and Applicative Properties
Source: MDPI journal article supplement (doi:10.3390/pharmaceutics16050600), 2024-04-29
Supplement: s1 [file s1]

Article

# Linseed Oil-Based Oleogel Vehicles for Hydrophobic Drug Delivery – Physicochemical and Applicative Properties

Sonia Kudłacik-Kramarczyk <sup>1,\*</sup>, Anna Drabczyk <sup>2,\*</sup>, Alicja Przybyłowicz <sup>1,3</sup> and Marcel Krzan <sup>1</sup>

<sup>1</sup> Jerzy Haber Institute of Catalysis and Surface Chemistry, Polish Academy of Sciences, 8 Niezapominajek St., 30-239 Krakow, Poland; marcel.krzan@ikifp.edu.pl (M.K.)

<sup>2</sup> CBRTF SA - Research and Development Center of Technology for Industry, Ludwika Waryńskiego 3A St., 00-645 Warsaw, Poland

<sup>3</sup> Faculty of Mechanical Engineering, Cracow University of Technology, Cracow University of Technology, 37 Jana Pawła II Av., 31-864 Krakow, Poland; alicja.przybylowicz@student.pk.edu.pl (A.P.)

\* Correspondence: sonia.kudlacik-kramarczyk@ikifp.edu.pl (S.K.-K.), anna.drabczyk@cbrtp.pl (A.D.)

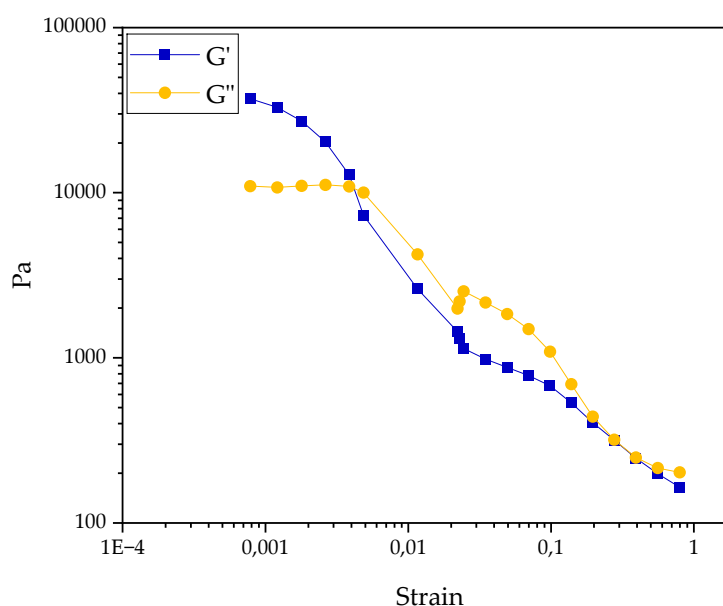

**Figure S1.** Transition point between liquid and solid states for o-gel\_15%\_T20.

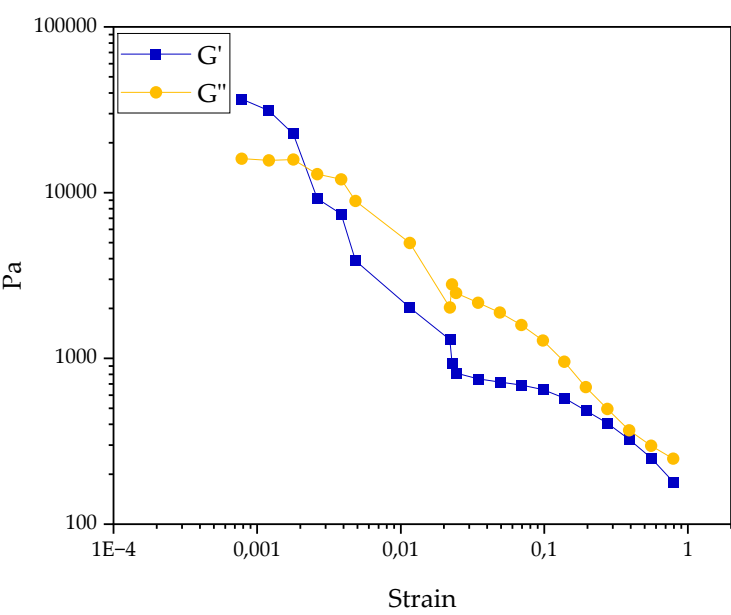

**Figure S2.** Transition point between liquid and solid states for o-gel\_25%\_T20.

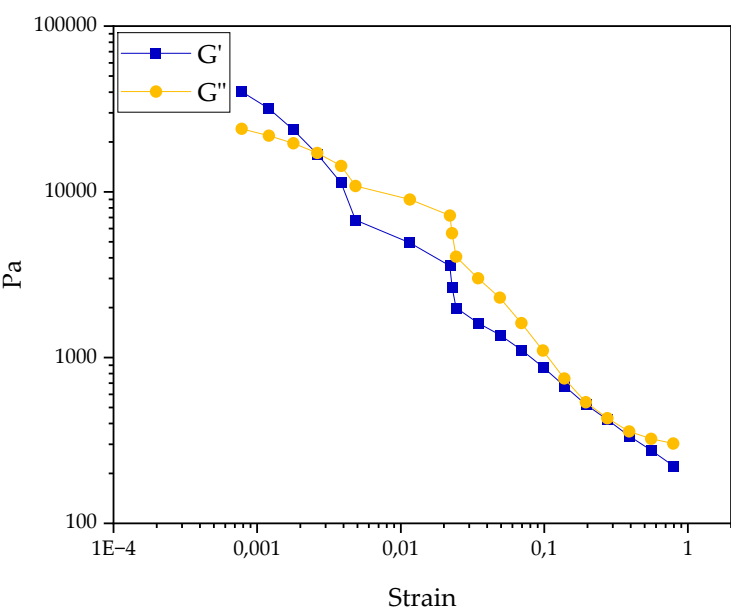

**Figure S3.** Transition point between liquid and solid states for o-gel\_15%\_T80.

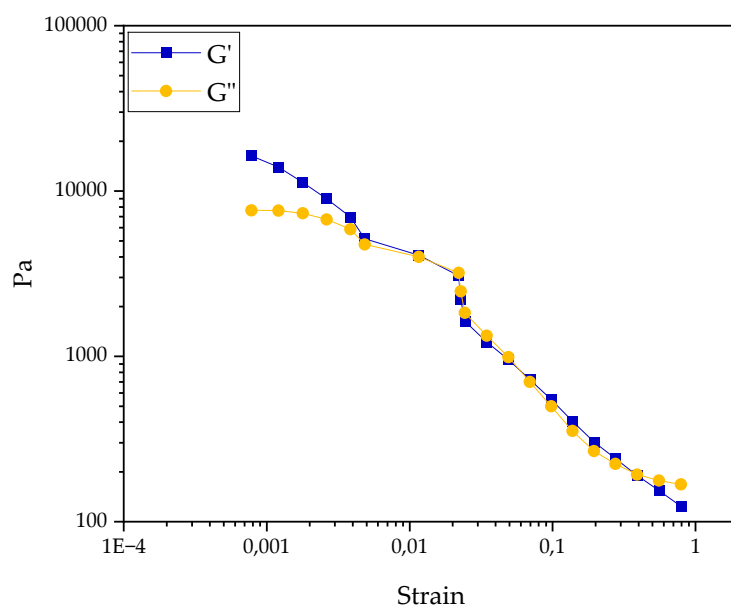

**Figure S4.** Transition point between liquid and solid states for o-gel\_25%\_T80.
